# Supplementary material for: Behavioural Responses and Mortality of Mozambique Tilapia Oreochromis mossambicus to Three Commonly Used Macadamia Plantation Pesticides
Source: MDPI journal article supplement (doi:10.3390/w14081257), 2022-04-13
Supplement: s1 [file s1]

Archive with 1 entries (1 files):
- water-1590103-supplementary.pdf
