# Supplementary material for: Behavioural Responses and Mortality of Mozambique Tilapia Oreochromis mossambicus to Three Commonly Used Macadamia Plantation Pesticides
Source: MDPI journal article supplement (doi:10.3390/w14081257), 2022-04-13
Supplement: s1 [file s1 › water-1590103-supplementary.pdf]

## Supplementary files

**Table S1.** Tukey's multiple comparisons results following one-way ANOVA for onset behaviour across Karate Zeon 10 CS concentrations.

| Variable   | Treatments | <i>p</i> |
|------------|------------|----------|
| Swimming   | K2 vs K8   | 0.004    |
| Vertical   | K1 vs K5   | <0.001   |
|            | K2 vs K5   | <0.001   |
|            | K3 vs K5   | <0.001   |
|            | K4 vs K5   | <0.001   |
|            | K5 vs K7   | 0.002    |
|            | K5 vs K8   | <0.001   |
| Motionless | K1 vs K7   | 0.008    |
|            | K2 vs K7   | 0.008    |
|            | K3 vs K7   | 0.004    |
|            | K4 vs K7   | 0.006    |
|            | K5 vs K7   | 0.036    |
| Surface    | K1 vs K3   | 0.020    |
|            | K2 vs K7   | 0.048    |
|            | K3 vs K5   | 0.039    |
|            | K3 vs K8   | 0.016    |
| Mortality  | K1 vs K7   | 0.008    |
|            | K1 vs K8   | 0.034    |
|            | K2 vs K7   | 0.007    |
|            | K2 vs K8   | 0.030    |
|            | K4 vs K8   | 0.023    |

**Table S2.** Tukey's multiple comparisons results following one-way ANOVA for onset behaviour across Mulan 20 SP concentrations.

| Variable | Treatments | <i>p</i> |
|----------|------------|----------|
| Swimming | M2 vs M3   | 0.008    |
|          | M2 vs M7   | 0.031    |
|          | M2 vs M8   | 0.031    |
|          | M2 vs M9   | 0.002    |
| Surface  | M1 vs M3   | 0.011    |
|          | M1 vs M4   | 0.009    |
|          | M1 vs M7   | 0.014    |
|          | M1 vs M8   | 0.021    |
|          | M2 vs M3   | <0.001   |
|          | M2 vs M4   | <0.001   |
|          | M2 vs M7   | <0.001   |
|          | M2 vs M8   | <0.001   |

**Table S3.** Tukey's multiple comparisons results following one-way ANOVA for onset behaviour across Pyrinex 250 CS concentrations.

| Variable            | Treatments | <i>p</i> |
|---------------------|------------|----------|
| Swimming            | P1 vs P2   | 0.003    |
|                     | P2 vs P3   | 0.030    |
|                     | P2 vs P4   | <0.001   |
|                     | P2 vs P7   | 0.006    |
|                     | P2 vs P8   | 0.006    |
|                     | P2 vs P9   | <0.001   |
| Vertical            | P1 vs P5   | <0.001   |
|                     | P1 vs P6   | <0.001   |
|                     | P1 vs P7   | <0.001   |
|                     | P1 vs P8   | <0.001   |
|                     | P1 vs P9   | <0.001   |
|                     | P2 vs P5   | <0.001   |
|                     | P2 vs P6   | <0.001   |
|                     | P2 vs P7   | <0.001   |
|                     | P2 vs P8   | <0.001   |
|                     | P2 vs P9   | 0.002    |
|                     | P3 vs P5   | <0.001   |
|                     | P3 vs P6   | <0.001   |
|                     | P3 vs P7   | <0.001   |
|                     | P3 vs P8   | <0.001   |
|                     | P3 vs P9   | <0.001   |
|                     | P4 vs P5   | <0.001   |
|                     | P4 vs P6   | <0.001   |
|                     | P4 vs P7   | <0.001   |
|                     | P4 vs P8   | <0.001   |
|                     | P4 vs P9   | 0.002    |
|                     | P5 vs P6   | <0.001   |
|                     | P5 vs P7   | <0.001   |
|                     | P5 vs P8   | <0.001   |
|                     | P5 vs P9   | <0.001   |
| Loss of equilibrium | P3 vs P7   | 0.031    |
